# Supplementary material for: The effect of nitrogen lone-pair interaction on the conduction in a single-molecule junction with amine-Au bonding
Source: Springer Nature journal article supplement (doi:10.1038/s41598-018-22893-7), 2018-03-27
Supplement: MOESM1 [file 41598_2018_22893_MOESM1_ESM.pdf]

**Supplementary information**

**The effect of nitrogen lone-pair interaction on the conduction in a single-molecule junction with amine-Au bonding**

Yoshihiro Sugita, Atsushi Taninaka, Shoji Yoshida, Osamu Takeuchi, and Hidemi Shigekawa

Faculty of Pure and Applied Sciences, University of Tsukuba, Tsukuba 305-8571, Japan

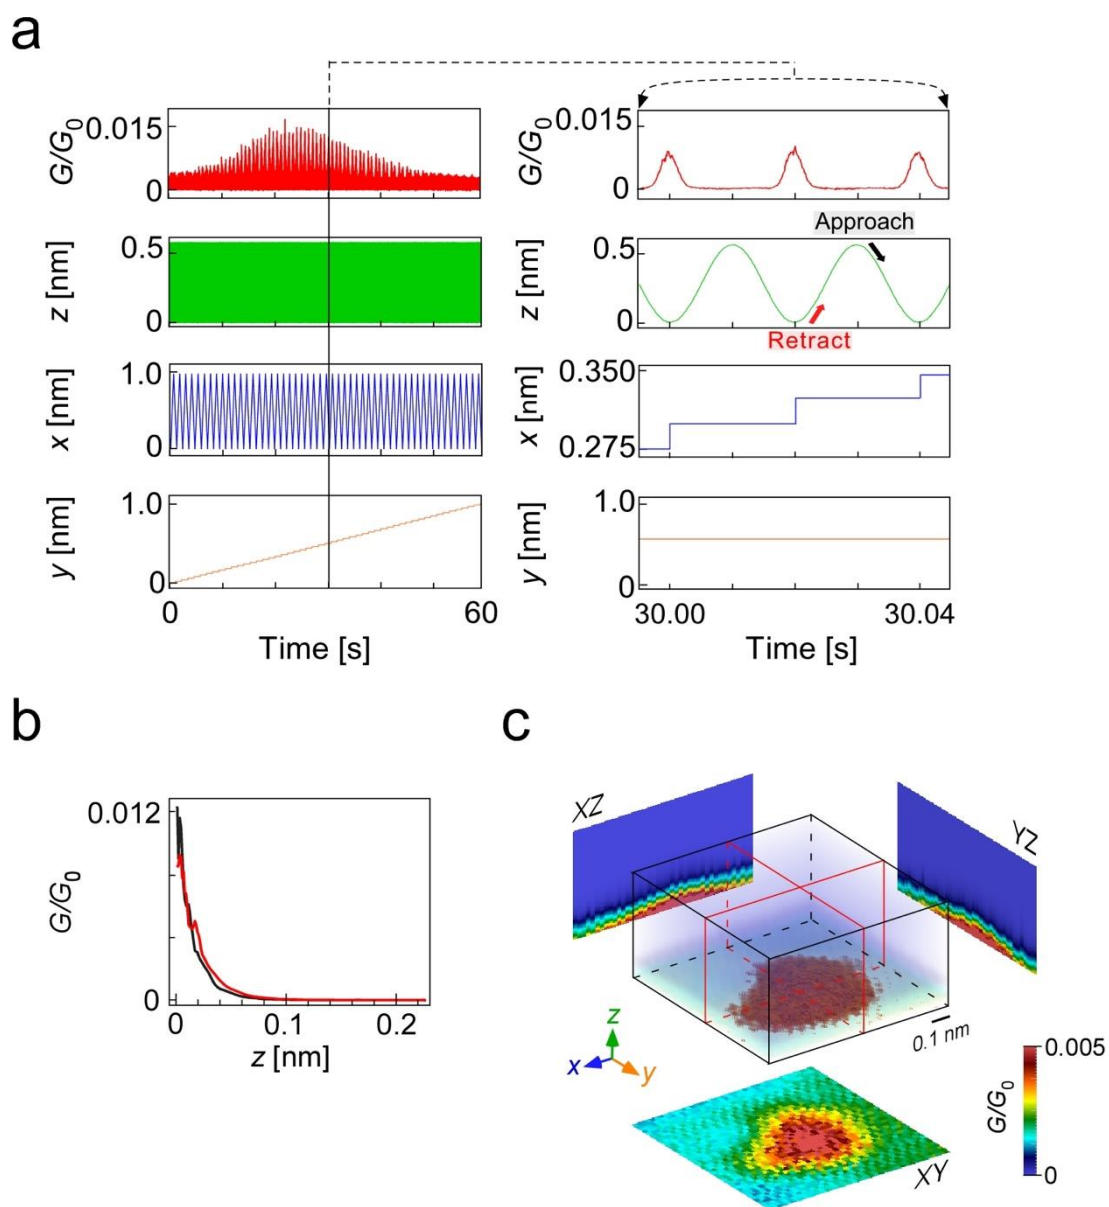

Fig. S1 **Measurement scheme and example of data for BDA/Au(111).** *a* Measurement scheme and an example of a signal. A high-conductance signal was obtained above the molecule. *b*  $G$ - $z$  curves showing an exponential characteristic. *c* Volume plot of the 3D dynamic probe data obtained for a BDA/Au(111) surface before forming a junction (data for STM tip retraction). The cross sections correspond to the frames indicated by the red

lines in the volume plot.

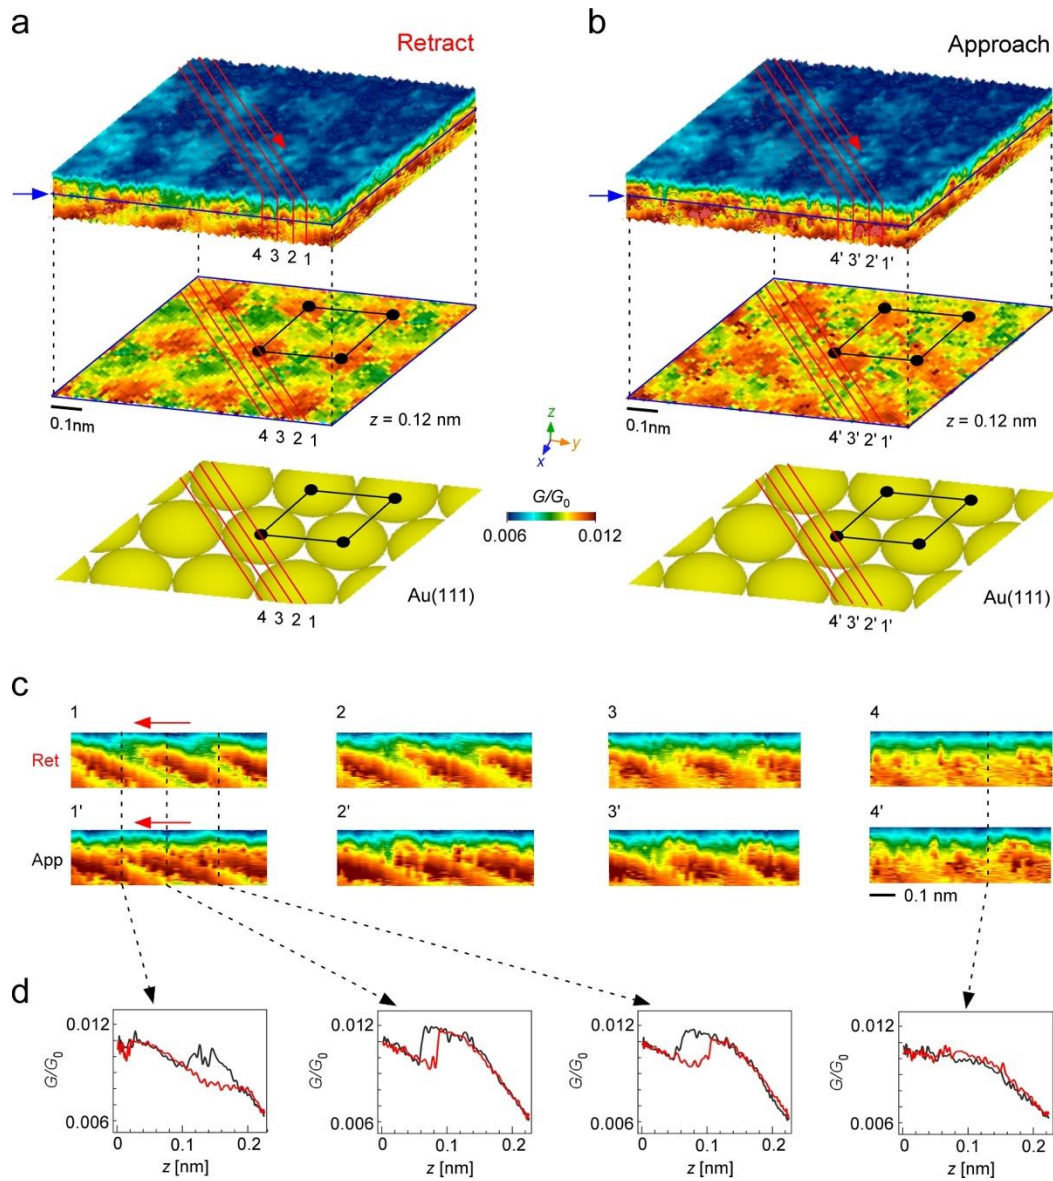

Fig. S2 **Experimental data.** (*a, b*) 3D volume plots of conductance obtained by the 3D dynamic probe method shown in Fig. 1 while the STM tip was retracted and made to approach the Au surface, respectively. The  $x$ - $y$  cross sections corresponding to the blue arrows in the volume plot (for  $z = 0.12$  nm) and schematic structures of the Au(111) surface are shown together. *c* Cross sections of the volume plots along 1 to 4 and 1' to 4' shown in *a* (*b*), respectively. The red arrows

drawn in **1** and **1'** show the direction of the cross-sections as indicated by the arrows drawn in the 3D plots in **a** and **b**. **d**  $G$ - $z$  curves along the dotted lines in **c**. Red and black lines show the curves obtained when the STM tip was retracted and made to approach the Au surface, respectively. The observed change in the three  $G$ - $z$  curves obtained for the cross-section **1** is explained by the positional difference (shift along AB) for the back and force measurement. About the change from **1** to **4** in **c** and **d**, the image of arc becomes dull and the rapid change in the  $G$ - $z$  curve was reduced, which is considered to be due to the change in the conformational relationship between the N lone-pair in the amine and the Au atom at the substrate. For further understanding, detailed simulations of the  $G$ - $z$  curves for the two lines between AB and CD are necessary, which we remain for future work.
